# Supplementary material for: Triiodothyronine (T3) promotes brown fat hyperplasia via thyroid hormone receptor α mediated adipocyte progenitor cell proliferation
Source: PubMed Central journal article supplement (PMC9192766; doi:10.1038/s41467-022-31154-1), 2022-06-13
Supplement: 41467_2022_31154_MOESM3_ESM.pdf [file 41467_2022_31154_MOESM3_ESM.pdf]

## **Description of Additional Supplementary Files**

File Name: Supplementary Data 1

Description: Differentially expressed genes between clusters as detected by scRNA-seq.

File Name: Supplementary Data 2.

Description: Differentially expressed genes between groups as detected by scRNA-seq.

File Name: Supplementary Data 3

Description: Gene Ontology (GO) analysis of the up-regulated genes in Group 5.

File Name: Supplementary Data 4

Description: Differentially expressed genes between states as detected by scRNA-seq.

File Name: Supplementary Data 5

Description: Gene Ontology (GO) analysis of the up-regulated genes in T3 group vs MMI group.

File Name: Supplementary Data 6

Description: Primer information.
